# Supplementary material for: Multimodal integration to identify the invasion status of lung adenocarcinoma intraoperatively
Source: PubMed Central journal article supplement — iScience. 2024 Nov 19;27(12):111421. doi: 10.1016/j.isci.2024.111421 (PMC11647133; doi:10.1016/j.isci.2024.111421), 2024-11-19
Supplement: mmc1.pdf [file mmc1.pdf]

**Supplemental information**

**Multimodal integration to identify the invasion  
status of lung adenocarcinoma intraoperatively**

**Xueyun Tan, Feng Pan, Na Zhan, Sufei Wang, Zegang Dong, Yan Li, Guanghai Yang, Bo Huang, Yanran Duan, Hui Xia, Yaqi Cao, Min Zhou, Zhilei Lv, Qi Huang, Shan Tian, Liang Zhang, Mengmeng Zhou, Lian Yang, and Yang Jin**

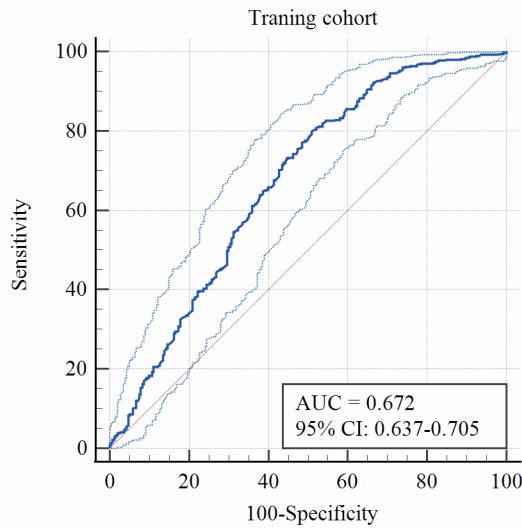

**Figure S1.** Performance of clinical indicators (age and eosinophil count) showed by ROC curve in the multimodal training cohort.

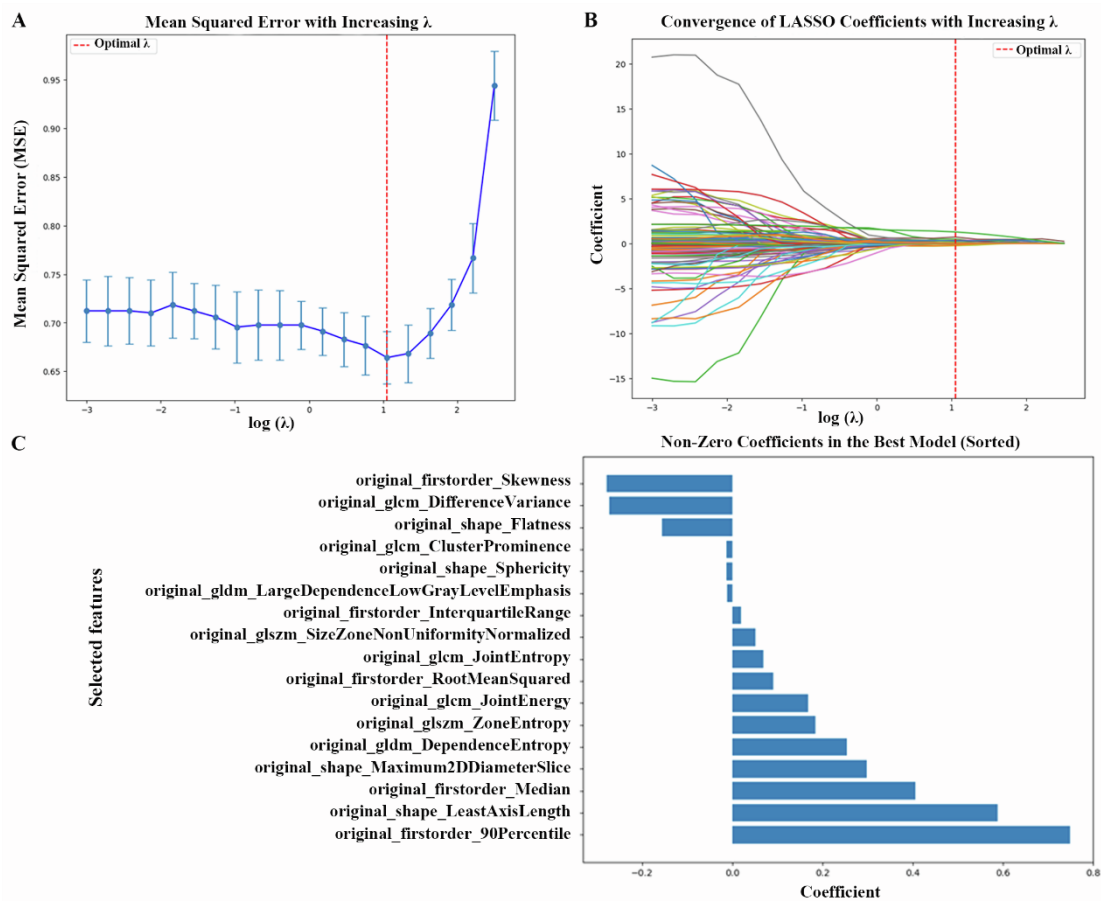

**Figure S2.** Radiomic feature selection using the least absolute shrinkage and the histogram of the Rad-score based on the selected features.

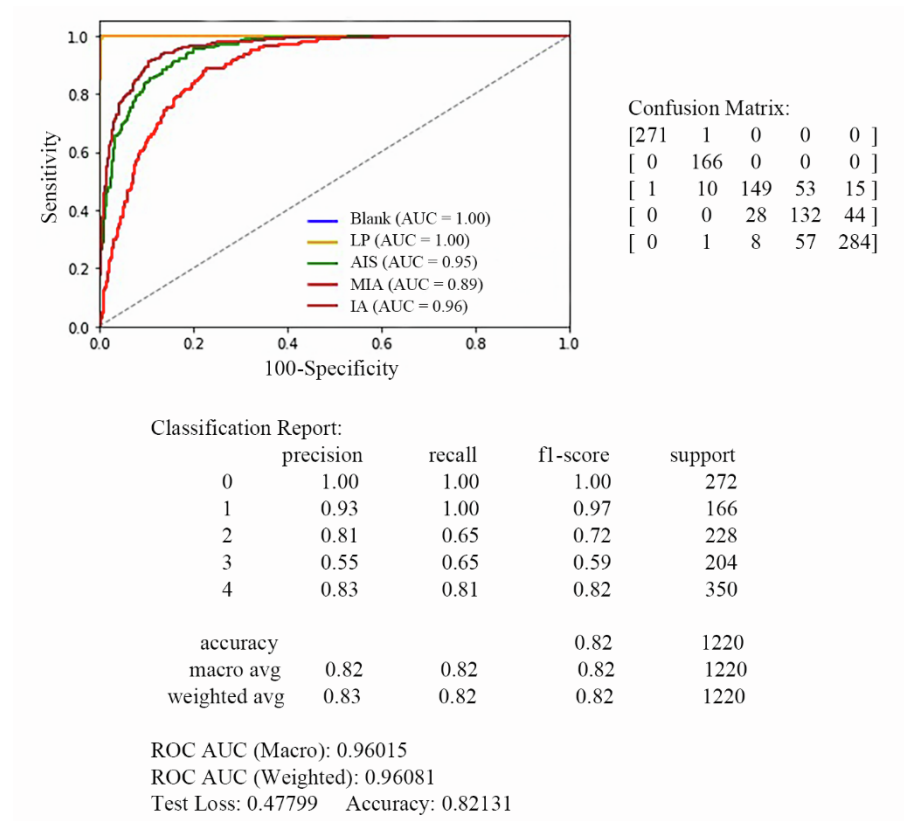

**Figure S3.** Predictive performance of EfficientNet B5 model to classify 1220 segmented patches into five pathologic classes, including “Blank”, “LP”, “AIS”, “MIA”, and “IA”.

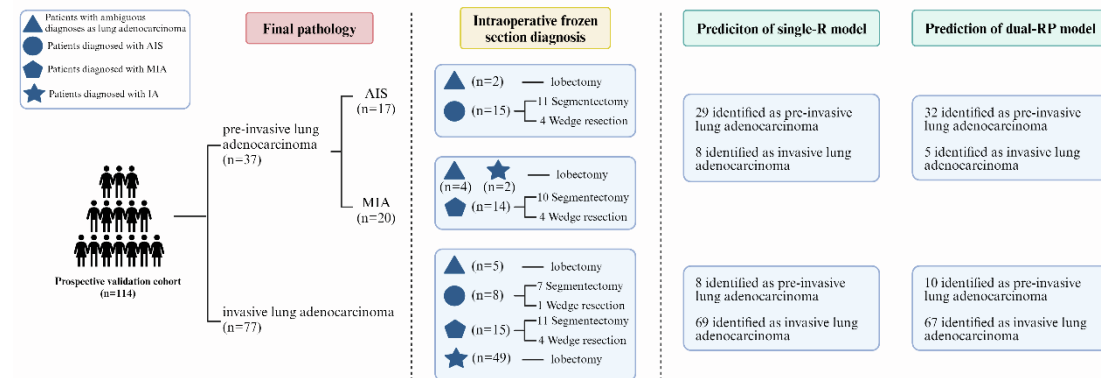

**Figure S4.** Comparison of FP, intraoperative FS diagnosis, and predictions of single-R model and dual-RP model in the prospective validation cohort.

FP, final pathology; FS, frozen section; AIS, adenocarcinoma in situ; MIA, minimally invasive adenocarcinoma; Single-R model, single-modality radiomic model; Dual-RP model, radiomics + pathology dual-modality model.

**Table S1. Radiomic feature groups chosen in this study**

| Feature Names                                   | Feature Names                                   |
|-------------------------------------------------|-------------------------------------------------|
| original_shape_Elongation                       | original_glcm_InverseVariance                   |
| original_shape_Flatness                         | original_glcm_MaximumProbability                |
| original_shape_LeastAxisLength                  | original_glcm_SumEntropy                        |
| original_shape_MajorAxisLength                  | original_glcm_SumSquares                        |
| original_shape_Maximum2DDiameterColumn          | original_glrIm_GrayLevelNonUniformity           |
| original_shape_Maximum2DDiameterRow             | original_glrIm_GrayLevelNonUniformityNormalized |
| original_shape_Maximum2DDiameterSlice           | original_glrIm_GrayLevelVariance                |
| original_shape_Maximum3DDiameter                | original_glrIm_HighGrayLevelRunEmphasis         |
| original_shape_MeshVolume                       | original_glrIm_LongRunEmphasis                  |
| original_shape_MinorAxisLength                  | original_glrIm_LongRunHighGrayLevelEmphasis     |
| original_shape_Sphericity                       | original_glrIm_LongRunLowGrayLevelEmphasis      |
| original_shape_SurfaceArea                      | original_glrIm_LowGrayLevelRunEmphasis          |
| original_shape_SurfaceVolumeRatio               | original_glrIm_RunEntropy                       |
| original_shape_VoxelVolume                      | original_glrIm_RunLengthNonUniformity           |
| original_firstorder_10Percentile                | original_glrIm_RunLengthNonUniformityNormalized |
| original_firstorder_90Percentile                | original_glrIm_RunPercentage                    |
| original_firstorder_Energy                      | original_glrIm_RunVariance                      |
| original_firstorder_Entropy                     | original_glrIm_ShortRunEmphasis                 |
| original_firstorder_InterquartileRange          | original_glrIm_ShortRunHighGrayLevelEmphasis    |
| original_firstorder_Kurtosis                    | original_glrIm_ShortRunLowGrayLevelEmphasis     |
| original_firstorder_Maximum                     | original_glszm_GrayLevelNonUniformity           |
| original_firstorder_MeanAbsoluteDeviation       | original_glszm_GrayLevelNonUniformityNormalized |
| original_firstorder_Mean                        | original_glszm_GrayLevelVariance                |
| original_firstorder_Median                      | original_glszm_HighGrayLevelZoneEmphasis        |
| original_firstorder_Minimum                     | original_glszm_LargeAreaEmphasis                |
| original_firstorder_Range                       | original_glszm_LargeAreaHighGrayLevelEmphasis   |
| original_firstorder_RobustMeanAbsoluteDeviation | original_glszm_LargeAreaLowGrayLevelEmphasis    |
| original_firstorder_RootMeanSquared             | original_glszm_LowGrayLevelZoneEmphasis         |
| original_firstorder_Skewness                    | original_glszm_SizeZoneNonUniformity            |
| original_firstorder_TotalEnergy                 | original_glszm_SizeZoneNonUniformityNormalized  |
| original_firstorder_Uniformity                  | original_glszm_SmallAreaEmphasis                |
| original_firstorder_Variance                    | original_glszm_SmallAreaHighGrayLevelEmphasis   |
| original_glem_Autocorrelation                   | original_glszm_SmallAreaLowGrayLevelEmphasis    |
| original_glcm_JointAverage                      | original_glszm_ZoneEntropy                      |
| original_glcm_ClusterProminence                 | original_glszm_ZonePercentage                   |
| original_glem_ClusterShade                      | original_glszm_ZoneVariance                     |
| original_glcm_ClusterTendency                   | original_gldm_DependenceEntropy                 |
| original_glcm_Contrast                          | original_gldm_DependenceNonUniformity           |
| original_glem_Correlation                       | original_gldm_DependenceNonUniformityNormalized |
| original_glcm_DifferenceAverage                 | original_gldm_DependenceVariance                |
| original_glcm_DifferenceEntropy                 | original_gldm_GrayLevelNonUniformity            |

|                                  |                                                    |
|----------------------------------|----------------------------------------------------|
| original_glem_DifferenceVariance | original_gldm_GrayLevelVariance                    |
| original_glem_JointEnergy        | original_gldm_HighGrayLevelEmphasis                |
| original_glem_JointEntropy       | original_gldm_LargeDependenceEmphasis              |
| original_glem_Imc1               | original_gldm_LargeDependenceHighGrayLevelEmphasis |
| original_glem_Imc2               | original_gldm_LargeDependenceLowGrayLevelEmphasis  |
| original_glem_Idm                | original_gldm_LowGrayLevelEmphasis                 |
| original_glem_Idmn               | original_gldm_SmallDependenceEmphasis              |
| original_glem_Id                 | original_gldm_SmallDependenceHighGrayLevelEmphasis |
| original_glem_Idn                | original_gldm_SmallDependenceLowGrayLevelEmphasis  |

**Table S2. Univariable and multivariable analyses in clinical indicators associated with invasiveness in multimodal training cohort.**

| Characteristics                         | pre-invasive (254)  | invasive (507)      | Univariable analysis<br>HR (95%CI) | P value | Multivariable analysis<br>HR (95%CI) | P value |
|-----------------------------------------|---------------------|---------------------|------------------------------------|---------|--------------------------------------|---------|
| Age, years                              | 53 (42-62)          | 60 (53-66)          | 1.06 (1.04-1.07)                   | <0.001  | 1.10 (1.04-1.17)                     | 0.001   |
| Sex                                     |                     |                     | 0.44 (0.32-0.62)                   | <0.001  | 0.73 (0.29-1.81)                     | 0.493   |
| Male                                    | 63 (24.8)           | 216 (42.6)          |                                    |         |                                      |         |
| Female                                  | 191 (75.2)          | 291 (57.4)          |                                    |         |                                      |         |
| Smoking history                         |                     |                     | 1.26 (0.55-2.91)                   | 0.583   |                                      |         |
| Yes                                     | 43 (16.9)           | 98 (19.3)           |                                    |         |                                      |         |
| No                                      | 211 (83.1)          | 409 (80.7)          |                                    |         |                                      |         |
| LDH, U/L                                | 181 (160-201)       | 181 (162-201)       | 1.00 (0.99-1.01)                   | 0.850   |                                      |         |
| Hematologic indicators, median (IQR)    |                     |                     |                                    |         |                                      |         |
| WBCs, ×10 <sup>9</sup> /L               | 5.27 (4.39-6.46)    | 5.27 (4.48-6.49)    | 0.99 (0.90-1.08)                   | 0.779   |                                      |         |
| RBCs, ×10 <sup>9</sup> /L               | 4.21 (3.91-4.54)    | 4.29 (3.95-4.58)    | 1.08 (0.80-1.45)                   | 0.636   |                                      |         |
| Hemoglobin, g/L                         | 126 (119-138)       | 129 (120-140.75)    | 1.01 (1.00-1.02)                   | 0.073   |                                      |         |
| HCT, %                                  | 38.40 (36.20-42.30) | 39.10 (36.50-42.40) | 1.02 (0.99-1.06)                   | 0.216   |                                      |         |
| MCV, fl                                 | 92.10 (89.40-94.70) | 92.60 (89.80-95.40) | 1.02 (0.99-1.05)                   | 0.222   |                                      |         |
| MCH, pg                                 | 30.30 (29.40-31.40) | 30.70 (29.60-31.70) | 1.09 (1.01-1.17)                   | 0.031   | 1.12 (0.94-1.34)                     | 0.216   |
| MCHC, g/L                               | 328 (322-336)       | 331 (323-338)       | 1.02 (1.00-1.03)                   | 0.020   | 1.00 (0.97-1.03)                     | 0.927   |
| Platelets, ×10 <sup>9</sup> /L          | 213 (177-257)       | 206 (172-242)       | 1.00 (0.99-1.00)                   | 0.061   |                                      |         |
| Neutrophils, ×10 <sup>9</sup> /L        | 2.91 (2.18-3.72)    | 2.99 (2.40-3.82)    | 1.00 (0.89-1.11)                   | 0.965   |                                      |         |
| Lymphocytes, ×10 <sup>9</sup> /L        | 1.73 (1.47-2.16)    | 1.69 (1.35-2.10)    | 0.85 (0.65-1.11)                   | 0.222   |                                      |         |
| NLR                                     | 1.65 (1.19-2.26)    | 1.76 (1.34-2.25)    | 1.06 (0.93-1.20)                   | 0.390   |                                      |         |
| Monocytes, ×10 <sup>9</sup> /L          | 0.4 (0.3-0.5)       | 0.4 (0.3-0.5)       | 2.76 (0.97-7.81)                   | 0.056   |                                      |         |
| Eosinophils, ×10 <sup>9</sup> /L        | 0.10 (0.06-0.16)    | 0.10 (0.07-0.19)    | 5.62 (1.29-24.49)                  | 0.021   | 20.96 (1.18-373.04)                  | 0.038   |
| Basophils, ×10 <sup>9</sup> /L          | 0.03 (0.02-0.04)    | 0.03 (0.02-0.04)    | 0.35 (0-368.03)                    | 0.765   |                                      |         |
| PDW, fl                                 | 12.70 (11.30-14.35) | 13.20 (11.70-15.70) | 1.09 (1.02-1.16)                   | 0.016   | 1.02 (0.92-1.12)                     | 0.753   |
| MPV, fl                                 | 10.50 (9.70-11.20)  | 10.30 (9.30-11.20)  | 1.01 (0.96-1.06)                   | 0.760   |                                      |         |
| Liver function indicators, median (IQR) |                     |                     |                                    |         |                                      |         |
| AST, U/L                                | 20 (17-23)          | 20 (17-24)          | 1.00 (0.98-1.01)                   | 0.944   |                                      |         |
| ALT, U/L                                | 16 (12-22)          | 17 (12-25)          | 1.01 (0.99-1.02)                   | 0.319   |                                      |         |

|                                               |                        |                        |                   |        |                  |       |
|-----------------------------------------------|------------------------|------------------------|-------------------|--------|------------------|-------|
| ALP, U/L                                      | 66.00 (51.25-77.75)    | 69.00 (56.00-82.25)    | 1.00 (1.00-1.01)  | 0.572  |                  |       |
| γ-GT, U/L                                     | 17.00 (12.00-26.00)    | 19.00 (14.00-28.75)    | 1.00 (1.00-1.00)  | 0.559  |                  |       |
| TBA, μmol/L                                   | 3.64 (2.40-6.44)       | 4.00 (2.50-6.18)       | 1.00 (0.97-1.02)  | 0.779  |                  |       |
| TBIL, μmol/L                                  | 12.23 (9.30-15.57)     | 12.10 (9.30-15.40)     | 1.00 (0.97-1.03)  | 0.875  |                  |       |
| DBIL, μmol/L                                  | 3.80 (2.90-5.00)       | 3.90 (2.80-5.10)       | 1.02 (0.94-1.11)  | 0.560  |                  |       |
| Total protein, g/L                            | 66.00 (63.00-70.18)    | 65.20 (61.90-68.70)    | 0.97 (0.94-1.00)  | 0.029  | 0.99 (0.94-1.04) | 0.619 |
| Albumin, g/L                                  | 41.40 (39.10-43.70)    | 40.65 (38.90-42.90)    | 0.94 (0.89-0.98)  | 0.006  | 0.94 (0.86-1.04) | 0.216 |
| Globin, g/L                                   | 25.00 (23.20-26.90)    | 24.20 (22.20-26.80)    | 0.96 (0.91-1.00)  | 0.055  |                  |       |
| A/G                                           | 1.66 (1.55-1.80)       | 1.70 (1.51-1.86)       | 1.34 (0.71-2.53)  | 0.374  |                  |       |
| Renal function indicators, median (IQR)       |                        |                        |                   |        |                  |       |
| BUN, mmol/L                                   | 5.05 (4.33-6.21)       | 5.42 (4.49-6.56)       | 1.15 (1.03-1.27)  | 0.010  | 0.94 (0.79-1.12) | 0.475 |
| Serum creatinine, μmol/L                      | 59.00 (51.40-68.00)    | 64.00 (54.15-74.05)    | 1.02 (1.01-1.03)  | 0.003  | 1.03 (0.98-1.08) | 0.220 |
| UA, μmol/L                                    | 293.00 (245.00-345.00) | 300.90 (247.00-361.50) | 1.00 (1.00-1.00)  | 0.313  |                  |       |
| Creatine kinase, U/L                          | 76 (58-101)            | 72 (55-94)             | 1.00 (1.00-1.00)  | 0.776  |                  |       |
| eGFR, mL/min per 1.73 m <sup>2</sup>          | 101.06 (92.67-111.64)  | 96.29 (89.39-103.14)   | 0.97 (0.95-0.98)  | <0.001 | 1.06 (0.99-1.13) | 0.106 |
| Blood glucose and lipids, median (IQR)        |                        |                        |                   |        |                  |       |
| Glucose, mmol/L                               | 4.85 (4.50-5.33)       | 5.00 (4.60-5.48)       | 1.20 (1.02-1.42)  | 0.032  | 1.04 (0.82-1.32) | 0.752 |
| TCh, mmol/L                                   | 4.52 (4.00-5.18)       | 4.56 (4.00-5.08)       | 1.01 (0.83-1.22)  | 0.920  |                  |       |
| TG, mmol/L                                    | 1.05 (0.77-1.53)       | 1.20 (0.88-1.70)       | 1.28 (1.02-1.61)  | 0.032  | 1.16 (0.77-1.75) | 0.485 |
| HDLC, mmol/L                                  | 1.27 (1.05-1.53)       | 1.16 (0.99-1.44)       | 0.44 (0.26-0.72)  | 0.001  | 1.18 (0.50-2.81) | 0.710 |
| LDLC, mmol/L                                  | 2.64 (2.19-3.17)       | 2.68 (2.24-3.18)       | 1.02 (0.81-1.28)  | 0.861  |                  |       |
| Coagulation function indicators, median (IQR) |                        |                        |                   |        |                  |       |
| TT, seconds                                   | 16.90 (16.20-17.80)    | 17.30 (16.40-18.20)    | 1.18 (1.05-1.33)  | 0.005  | 1.07 (0.84-1.36) | 0.581 |
| FIB, g/l                                      | 2.64 (2.37-3.02)       | 2.78 (2.42-3.22)       | 1.44 (1.12-1.84)  | 0.004  | 1.33 (0.87-2.05) | 0.190 |
| APTT, seconds                                 | 27.90 (25.50-33.50)    | 31.30 (26.20-35.60)    | 1.05 (1.02-1.08)  | 0.002  | 0.98 (0.93-1.03) | 0.437 |
| INR                                           | 0.98 (0.95-1.06)       | 1.00 (0.95-1.06)       | 2.12 (0.38-12.00) | 0.393  |                  |       |
| PT, seconds                                   | 11.80 (11.10-12.80)    | 12.30 (11.40-12.90)    | 1.21 (1.06-1.39)  | 0.006  | 1.06 (0.83-1.36) | 0.624 |

Data are presented as median (IQR) for continuous variables and n (%) for category variables.

HR, hazard ratio; CI, confidence interval; LDH, lactate dehydrogenase; WBC, white blood cell count; RBC, red blood cell count; HCT, hematocrit; MCV, mean corpuscular volume; MCH, mean corpuscular hemoglobin; MCHC, mean corpuscular hemoglobin concentration; NLR, neutrophil-to-lymphocyte ratio; PDW, platelet distribution width; MPV, mean platelet volume; AST, aspartate aminotransferase; ALT, alanine aminotransferase; ALP, alkaline phosphatase; γ-GT, γ-glutamyl transpeptidase; TBA, total bile acid; TBIL, total bilirubin; DBIL, direct bilirubin; A/G, albumin/globin; BUN, blood urea nitrogen; UA, urine acid; eGFR, estimated glomerular filtration rate; TCh, total cholesterol; TG, triglyceride; HDLC, high density lipoprotein cholesterol; LDLC, low density lipoprotein cholesterol; TT, thrombin time; FIB, fibrinogen; APTT, activated partial thromboplastin time; INR, international normalized ratio; PT: prothrombin time.

**Table S3. Characteristics of demographic information and clinical indicators of participants in radiology testing, pathology testing, and prospective validation cohorts.**

| Characteristics                         | Radiology testing cohort<br>(433) | Pathology testing cohort<br>(230) | Prospective validation<br>cohort (114) |
|-----------------------------------------|-----------------------------------|-----------------------------------|----------------------------------------|
| Age, years                              | 56 (48-64)                        | 57.5 (50-65)                      | 58 (52-65)                             |
| Sex                                     |                                   |                                   |                                        |
| Male                                    | 147 (33.9)                        | 88 (38.3)                         | 39 (34.2)                              |
| Female                                  | 286 (66.1)                        | 142 (61.7)                        | 75 (65.8)                              |
| Smoking history                         |                                   |                                   |                                        |
| Yes                                     | 361 (83.4)                        | 189 (82.2)                        | 92 (80.7)                              |
| No                                      | 72 (16.6)                         | 41 (17.8)                         | 22 (19.3)                              |
| LDH, U/L                                | 183 (163-205)                     | 184 (162-203)                     | 187 (169-204)                          |
| Hematologic indicators, median (IQR)    |                                   |                                   |                                        |
| WBCs, $\times 10^9/L$                   | 5.15 (4.18-6.18)                  | 5.27 (4.34-6.28)                  | 5.14 (4.43-6.14)                       |
| RBCs, $\times 10^9/L$                   | 4.16 (3.87-4.51)                  | 4.22 (3.98-4.56)                  | 4.20 (3.97-4.54)                       |
| Hemoglobin, g/L                         | 126 (117-137)                     | 128 (119-136)                     | 127 (119-138)                          |
| HCT, %                                  | 37.50 (35.00-40.40)               | 0.42 (0.39-34.70)                 | 38.00 (35.80-41.40)                    |
| MCV, fl                                 | 90.80 (88.60-93.40)               | 92.50 (89.90-95.00)               | 90.65 (88.50-94.30)                    |
| MCH, pg                                 | 30.70 (29.70-31.60)               | 30.40 (29.30-31.30)               | 30.30 (29.40-31.40)                    |
| MCHC, g/L                               | 337 (331-342)                     | 328 (321-335)                     | 331.50 (326.00-339.00)                 |
| Platelets, $\times 10^9/L$              | 205 (170-243)                     | 211 (173-250)                     | 199 (173-239)                          |
| Neutrophils, $\times 10^9/L$            | 2.90 (2.20-3.50)                  | 2.97 (2.24-3.63)                  | 2.71 (2.20-3.44)                       |
| Lymphocytes, $\times 10^9/L$            | 1.68 (1.39-2.02)                  | 1.70 (1.35-2.03)                  | 1.71 (1.44-2.10)                       |
| NLR                                     | 1.71 (1.29-2.13)                  | 1.75 (1.38-2.16)                  | 1.48 (1.27-2.00)                       |
| Monocytes, $\times 10^9/L$              | 0.40 (0.30-0.50)                  | 0.42 (0.32-0.51)                  | 0.41 (0.35-0.50)                       |
| Eosinophils, $\times 10^9/L$            | 0.10 (0.07-0.18)                  | 0.11 (0.07-0.19)                  | 0.10 (0.08-0.18)                       |
| Basophils, $\times 10^9/L$              | 0.02 (0.00-0.03)                  | 0.02 (0.01-0.04)                  | 0.02 (0.01-0.04)                       |
| PDW, fl                                 | 13.00 (12.50-13.50)               | 12.90 (11.80-13.90)               | 12.75 (12.30-13.40)                    |
| MPV, fl                                 | 9.90 (8.70-10.80)                 | 10.55 (9.80-11.50)                | 10.30 (9.70-11.00)                     |
| Liver function indicators, median (IQR) |                                   |                                   |                                        |
| AST, U/L                                | 21 (18-25)                        | 19 (16-23)                        | 21 (19-25)                             |
| ALT, U/L                                | 18 (13-27)                        | 15 (11-22)                        | 20 (15-26)                             |
| ALP, U/L                                | 62.00 (51.00-76.00)               | 67.00 (58.00-82.00)               | 69.00 (57.00-87.00)                    |
| $\gamma$ -GT, U/L                       | 16.00 (12.00-23.00)               | 17.00 (13.00-23.00)               | 17.00 (14.00-27.00)                    |
| TBA, $\mu\text{mol/L}$                  | 4.30 (2.70-6.70)                  | 4.27 (2.31-6.28)                  | 4.30 (2.60-6.80)                       |
| TBIL, $\mu\text{mol/L}$                 | 12.10 (9.80-15.10)                | 12.40 (9.20-15.70)                | 11.50 (9.20-16.00)                     |
| DBIL, $\mu\text{mol/L}$                 | 4.50 (3.50-5.60)                  | 4.00 (2.90-5.30)                  | 4.20 (3.30-6.30)                       |
| Total protein, g/L                      | 64.10 (61.00-67.80)               | 64.70 (62.30-69.20)               | 64.35 (61.10-68.20)                    |
| Albumin, g/L                            | 40.20 (38.40-42.50)               | 40.30 (37.80-42.80)               | 40.45 (38.30-42.60)                    |
| Globulin, g/L                           | 23.80 (21.50-26.20)               | 25.10 (22.90-27.10)               | 24.10 (21.70-26.10)                    |
| A/G                                     | 1.70 (1.60-1.90)                  | 1.62 (1.50-1.78)                  | 1.70 (1.60-1.80)                       |
| Renal function indicators, median (IQR) |                                   |                                   |                                        |
| BUN, mmol/L                             | 5.14 (4.30-6.02)                  | 5.39 (4.39-6.27)                  | 5.22 (4.45-6.15)                       |
| Serum creatinine, $\mu\text{mol/L}$     | 60.20 (52.80-72.80)               | 62.00 (54.00-74.00)               | 60.80 (54.40-71.10)                    |

|                                               |                        |                        |                        |
|-----------------------------------------------|------------------------|------------------------|------------------------|
| UA, $\mu\text{mol/L}$                         | 305.20 (258.00-359.00) | 296.00 (246.00-352.80) | 285.20 (234.95-352.20) |
| Creatine kinase, U/L                          | 75 (56-101)            | 76 (55-105)            | 74 (59-108)            |
| eGFR, mL/min per 1.73 m <sup>2</sup>          | 99.26 (90.16-107.83)   | 98.31 (91.00-104.01)   | 98.47 (89.88-103.77)   |
| Blood glucose and lipids, median (IQR)        |                        |                        |                        |
| Glucose, mmol/L                               | 4.80 (4.50-5.30)       | 4.88 (4.54-5.26)       | 4.90 (4.60-5.30)       |
| TCh, mmol/L                                   | 4.52 (3.95-5.10)       | 4.40 (3.72-4.80)       | 4.66 (4.05-5.32)       |
| TG, mmol/L                                    | 1.10 (0.78-1.60)       | 1.17 (0.89-1.73)       | 1.19 (0.87-1.81)       |
| HDLC, mmol/L                                  | 1.26 (1.05-1.54)       | 1.18 (0.94-1.36)       | 1.21 (1.06-1.53)       |
| LDLC, mmol/L                                  | 2.55 (2.11-3.05)       | 2.46 (1.95-2.92)       | 2.67 (2.19-3.21)       |
| Coagulation function indicators, median (IQR) |                        |                        |                        |
| TT, seconds                                   | 17.80 (17.10-18.50)    | 17.30 (16.60-18.15)    | 17.90 (17.25-18.55)    |
| FIB, g/l                                      | 2.74 (2.46-3.11)       | 2.71 (2.31-3.07)       | 2.96 (2.58-3.34)       |
| APTT, seconds                                 | 35.30 (33.30-37.50)    | 28.35 (25.50-34.15)    | 34.95 (33.70-37.55)    |
| INR                                           | 1.09 (1.05-1.14)       | 1.03 (0.97-1.09)       | 0.95 (0.91-1.01)       |
| PT, seconds                                   | 13.10 (12.70-13.50)    | 12.10 (11.30-12.90)    | 12.60 (12.25-12.90)    |

Data are presented as median (IQR) for continuous variables and n (%) for category variables. HR, hazard ratio; CI, confidence interval; LDH, lactate dehydrogenase; WBC, white blood cell count; RBC, red blood cell count; HCT, hematocrit; MCV, mean corpuscular volume; MCH, mean corpuscular hemoglobin; MCHC, mean corpuscular hemoglobin concentration; NLR, neutrophil-to-lymphocyte ratio; PDW, platelet distribution width; MPV, mean platelet volume; AST, aspartate aminotransferase; ALT, alanine aminotransferase; ALP, alkaline phosphatase;  $\gamma$ -GT,  $\gamma$ -glutamyl transpeptidase; TBA, total bile acid; TBIL, total bilirubin; DBIL, direct bilirubin; A/G, albumin/globin; BUN, blood urea nitrogen; UA, urine acid; eGFR, estimated glomerular filtration rate; TCh, total cholesterol; TG, triglyceride; HDLC, high density lipoprotein cholesterol; LDLC, low density lipoprotein cholesterol; TT, thrombin time; FIB, fibrinogen; APTT, activated partial thromboplastin time; INR, international normalized ratio; PT: prothrombin time.

**Table S4. Proportion of invasive classification for pathologic images in three cohorts identified by EfficientNet B5 model**

| Cohort                              | Invasion status | Classification      |                     |                    |
|-------------------------------------|-----------------|---------------------|---------------------|--------------------|
|                                     |                 | AIS, %              | MIA, %              | IA, %              |
| Multimodal training cohort (761)    | AIS (84)        | 22.53 (15.80-34.70) | 6.02 (3.29-9.00)    | 3.27 (1.47-8.04)   |
|                                     | MIA (170)       | 22.59 (14.64-34.46) | 11.93 (6.38-19.82)  | 3.59 (0.81-9.05)   |
|                                     | IA (507)        | 18.72 (11.88-28.85) | 17.63 (8.93-26.93)  | 20.39 (9.95-38.10) |
| Pathology testing cohort (230)      | AIS (67)        | 23.82 (16.41-34.25) | 4.60 (2.46-8.47)    | 2.30 (1.17-7.81)   |
|                                     | MIA (63)        | 29.28 (18.78-38.90) | 9.30 (5.58-14.34)   | 3.52 (1.37-9.55)   |
|                                     | IA (100)        | 22.81 (12.65-34.74) | 14.84 (9.52-22.98)  | 17.51 (6.48-32.92) |
| Prospective validation cohort (114) | AIS (17)        | 14.49 (10.16-21.45) | 15.63 (5.16-21.79)  | 1.19 (0.20-2.91)   |
|                                     | MIA (20)        | 28.07 (17.69-33.75) | 18.92 (12.57-33.26) | 1.97 (0.74-5.17)   |
|                                     | IA (77)         | 14.90 (10.27-24.20) | 21.40 (14.31-33.58) | 19.93 (8.16-30.99) |

Data are presented as median (IQR).

AIS, adenocarcinoma in situ; MIA, minimally invasive adenocarcinoma; IA, invasive adenocarcinoma.



**Table S5. NRI test for prediction improvements of dual-/multi-modality models compared to single-R or single-P models in multimodal training and prospective validation cohorts**

| Initial model  | Dual-/Multi-modality model | Multimodal training cohort |         | Prospective validation cohort |         |
|----------------|----------------------------|----------------------------|---------|-------------------------------|---------|
|                |                            | NRI (95% CI)               | P value | NRI (95% CI)                  | P value |
| Single-R model | Dual-RC model              | 0.0277 (0.0002-0.0555)     | 0.0515  | 0.0270 (-0.0364-0.0905)       | 0.4038  |
|                | Dual-RP model              | 0.0652 (0.0258-0.1046)     | 0.0012  | 0.0530 (-0.0197-0.1257)       | 0.1532  |
|                | Multi-RPC model            | 0.0296 (-0.0096-0.0689)    | 0.1386  | 0.0660 (-0.0108-0.1428)       | 0.0921  |
| Single-P model | Dual-PC model              | 0.1265 (-0.0237-0.2766)    | 0.0988  | -0.5855 (-0.9571- -0.2139)    | 0.0020  |
|                | Dual-RP model              | 0.1403 (0.0892-0.1914)     | <0.0001 | 0.1720 (0.0518-0.2922)        | 0.0050  |
|                | Multi-RPC model            | 0.1285 (0.0741-0.1828)     | <0.0001 | 0.1580 (0.0281-0.2878)        | 0.0171  |

Data were metric value with 95% CI provided in parentheses.

NRI, net reclassification improvement; Single-R model, single-modality radiomic model; Single-P model, single-modality pathologic model; Dual-RC model, radiomics + clinical indicators dual-modality model; Dual-PC model, pathology + clinical indicators dual-modality model; Dual-RP model, radiomics + pathology dual-modality model; Multi-RPC model, radiomics + pathology + clinical indicators multi-modality model.

**Table S6. IDI test for prediction improvements of dual-RC, dual-RP and multi-RPC models compared to single-R model, and dual-PC, dual-RP and multi-RPC models compared to single-P model in multimodal training and prospective validation cohorts**

| Initial model  | Dual-/Multi-modality model | Multimodal training cohort |         | Prospective validation cohort |         |
|----------------|----------------------------|----------------------------|---------|-------------------------------|---------|
|                |                            | IDI (95% CI)               | P value | IDI (95% CI)                  | P value |
| Single-R model | Dual-RC model              | 0.0073 (0.0016-0.0130)     | 0.0125  | -0.0167 (-0.0345-0.0011)      | 0.0667  |
|                | Dual-RP model              | 0.0429 (0.0266-0.0593)     | <0.0001 | 0.0402 (-0.0037-0.0841)       | 0.0724  |
|                | Multi-RPC model            | 0.0470 (0.0301-0.0639)     | <0.0001 | 0.0238 (-0.0252-0.0728)       | 0.3415  |
| Single-P model | Dual-PC model              | 0.0190 (0.0088-0.0292)     | 0.0003  | -0.0194 (-0.0459-0.0070)      | 0.1502  |
|                | Dual-RP model              | 0.1402 (0.113-0.1674)      | <0.0001 | 0.1947 (0.1215-0.2679)        | <0.0001 |
|                | Multi-RPC model            | 0.1443 (0.1168-0.1717)     | <0.0001 | 0.1782 (0.1070-0.2495)        | <0.0001 |

Data were metric value with 95% CI provided in parentheses.

IDI, integrated discrimination improvement; Single-R model, single-modality radiomic model; Single-P model, single-modality pathologic model; Dual-RC model, radiomics + clinical indicators dual-modality model; Dual-PC model, pathology + clinical indicators dual-modality model; Dual-RP model, radiomics + pathology dual-modality model; Multi-RPC model, radiomics + pathology + clinical indicators multi-modality model.

**Table S7. AIC test for prediction improvements of multi-RPC model compared to single-/dual-modality models in the multimodal training cohort**

| Models          | AIC value |
|-----------------|-----------|
| Single-P model  | 656.47    |
| Single-R model  | 565.44    |
| Dual-RC model   | 560.47    |
| Dual-PC model   | 650.32    |
| Dual-RP model   | 520.55    |
| Multi-RPC model | 517.85    |

Data were metric value with 95% CI provided in parentheses.

AIC, Akaike information criterion; Single-R model, single-modality radiomic model; Single-P model, single-modality pathologic model; Dual-RC model, radiomics + clinical indicators dual-modality model; Dual-PC model, pathology + clinical indicators dual-modality model; Dual-RP model, radiomics + pathology dual-modality model; Multi-RPC model, radiomics + pathology + clinical indicators multi-modality model.

**Table S8. Predictive performance of the models to distinguish AIS and MIA**

|                | Multimodal training cohort | Radiology testing cohort | Pathology testing cohort | Prospective validation cohort |
|----------------|----------------------------|--------------------------|--------------------------|-------------------------------|
| Single-R model |                            |                          |                          |                               |
| AUC            | 0.660 (0.598-0.718)        | 0.724 (0.668-0.775)      | -                        | 0.618 (0.444-0.772)           |
| Accuracy       | 0.680 (0.618-0.737)        | 0.696 (0.639-0.749)      | -                        | 0.622 (0.448-0.775)           |
| Sensitivity    | 0.544 (0.466-0.621)        | 0.567 (0.494-0.638)      | -                        | 0.800 (0.563-0.943)           |
| Specificity    | 0.738 (0.631-0.828)        | 0.837 (0.745-0.906)      | -                        | 0.471 (0.230-0.722)           |
| PPV            | 0.807 (0.740-0.860)        | 0.880 (0.820-0.922)      | -                        | 0.640 (0.519-0.745)           |
| NPV            | 0.446 (0.395-0.498)        | 0.478 (0.433-0.524)      | -                        | 0.667 (0.421-0.846)           |
| Single-P model |                            |                          |                          |                               |
| AUC            | 0.658 (0.596-0.716)        | -                        | 0.680 (0.592-0.759)      | 0.685 (0.512-0.828)           |
| Accuracy       | 0.684 (0.623-0.741)        | -                        | 0.600 (0.511-0.685)      | 0.622 (0.448-0.775)           |
| Sensitivity    | 0.568 (0.490-0.644)        | -                        | 0.841 (0.727-0.921)      | 1.000 (0.832-1.000)           |
| Specificity    | 0.750 (0.644-0.838)        | -                        | 0.478 (0.354-0.603)      | 0.353 (0.142-0.617)           |
| PPV            | 0.821 (0.755-0.871)        | -                        | 0.602 (0.540-0.661)      | 0.645 (0.561-0.721)           |
| NPV            | 0.463 (0.411-0.516)        | -                        | 0.762 (0.632-0.856)      | 1.000 (1.000-1.000)           |
| Dual-RC model  |                            |                          |                          |                               |
| AUC            | 0.657 (0.595-0.716)        | 0.730 (0.675-0.781)      | -                        | 0.597 (0.423-0.755)           |
| Accuracy       | 0.676 (0.614-0.733)        | 0.699 (0.643-0.752)      | -                        | 0.541 (0.369-0.705)           |
| Sensitivity    | 0.444 (0.368-0.522)        | 0.649 (0.578-0.716)      | -                        | 1.000 (0.832-1.000)           |
| Specificity    | 0.833 (0.736-0.906)        | 0.750 (0.649-0.834)      | -                        | 0.235 (0.068-0.499)           |
| PPV            | 0.843 (0.763-0.899)        | 0.846 (0.791-0.888)      | -                        | 0.606 (0.542-0.667)           |
| NPV            | 0.427 (0.387-0.468)        | 0.504 (0.448-0.560)      | -                        | 1.000 (1.000-1.000)           |
| Dual-PC model  |                            |                          |                          |                               |
| AUC            | 0.647 (0.585-0.706)        | -                        | 0.679 (0.591-0.758)      | 0.641 (0.467-0.792)           |
| Accuracy       | 0.644 (0.582-0.703)        | -                        | 0.615 (0.526-0.699)      | 0.622 (0.448-0.775)           |
| Sensitivity    | 0.527 (0.449-0.604)        | -                        | 0.778 (0.655-0.873)      | 0.750 (0.509-0.913)           |

|                 |                     |   |                     |                     |
|-----------------|---------------------|---|---------------------|---------------------|
| Specificity     | 0.786 (0.683-0.868) | - | 0.522 (0.397-0.646) | 0.588 (0.329-0.816) |
| PPV             | 0.832 (0.762-0.884) | - | 0.605 (0.536-0.670) | 0.682 (0.535-0.800) |
| NPV             | 0.452 (0.405-0.500) | - | 0.714 (0.599-0.807) | 0.667 (0.459-0.825) |
| Dual-RP model   |                     |   |                     |                     |
| AUC             | 0.675 (0.613-0.732) | - | -                   | 0.674 (0.500-0.818) |
| Accuracy        | 0.676 (0.614-0.733) | - | -                   | 0.541 (0.369-0.705) |
| Sensitivity     | 0.527 (0.449-0.604) | - | -                   | 0.600 (0.361-0.809) |
| Specificity     | 0.786 (0.683-0.868) | - | -                   | 0.765 (0.501-0.932) |
| PPV             | 0.832 (0.762-0.884) | - | -                   | 0.750 (0.542-0.884) |
| NPV             | 0.452 (0.405-0.500) | - | -                   | 0.619 (0.472-0.747) |
| Multi-RPC model |                     |   |                     |                     |
| AUC             | 0.673 (0.612-0.731) | - | -                   | 0.665 (0.491-0.811) |
| Accuracy        | 0.672 (0.610-0.729) | - | -                   | 0.595 (0.421-0.753) |
| Sensitivity     | 0.544 (0.466-0.621) | - | -                   | 0.600 (0.361-0.809) |
| Specificity     | 0.762 (0.657-0.848) | - | -                   | 0.765 (0.501-0.932) |
| PPV             | 0.821 (0.754-0.874) | - | -                   | 0.750 (0.542-0.884) |
| NPV             | 0.454 (0.404-0.505) | - | -                   | 0.619 (0.472-0.747) |

Data are presented as mean (95% CI).

AUC, area under the curve; NPV, negative predictive value; PPV, positive predictive value; Single-R model, single-modality radiomic model; Single-P model, single-modality pathologic model; Dual-RC model, radiomics + clinical indicators dual-modality model; Dual-PC model, pathology + clinical indicators dual-modality model; Dual-RP model, radiomics + pathology dual-modality model; Multi-RPC model, radiomics + pathology + clinical indicators multi-modality model.
